1        **Construction and validation of EGFP-expressing *Staphylococcus aureus***  
2        **clinical strains for adhesion and internalization assays on epithelial cells**

3

4            Sana Charaoui-Boukerzaza<sup>1#</sup>, M. Fedy Morgene<sup>1#</sup>, Josselin Rigail<sup>1,2</sup>, Estelle Audoux<sup>1</sup>,  
5        Zhiguo He<sup>3</sup>, Florence Grattard<sup>1,2</sup>, Anne Carricajo<sup>2</sup>, Bruno Pozzetto<sup>1,2</sup>, Philippe Berthelot<sup>1,2,4</sup>,  
6            Elisabeth Botelho-Nevers<sup>1,4</sup> and Paul O. Verhoeven<sup>1,2</sup>

7

8        1) GIMAP (Group for Mucosal Immunity and Pathogens Agents), EA 3064, Faculty of  
9        Medicine of St-Etienne, Jean Monnet University, University of Lyon, St-Etienne, France.

10       2) Laboratory of Infectious Agents and Hygiene, University Hospital of St-Etienne, St-Etienne,  
11       France.

12       3) BiiGC (Biology, Engineering and Imaging of Corneal Transplant), EA 2521, Faculty of  
13       Medicine of St-Etienne, Jean Monnet University, University of Lyon, St-Etienne, France.

14       4) Infectious Diseases Department, University Hospital of St-Etienne, St-Etienne, France.

15       # These authors contributed equally for this work

16

17       **Corresponding author:** Paul Verhoeven (MD, PhD), <http://orcid.org/0000-0003-4352-1263>

18       Laboratory of Infectious Agents and Hygiene, University Hospital of St-Etienne,

19       42055 Saint Etienne Cedex 02, France. Phone number: +33 477 82 92 28. Fax number: +33

20       477 82 84 60. E-mail: [paul.verhoeven@univ-st-etienne.fr](mailto:paul.verhoeven@univ-st-etienne.fr)

21 **ABSTRACT**

22

23 **Background:** *Staphylococcus aureus* is both a major pathogen and a commensal bacterium in  
24 humans. It is able to adhere at the surface of epithelial cells of the anterior nares and can trigger  
25 its internalization inside these non-professional phagocytic cells. To better understand the  
26 interactions of clinical isolates with keratinocytes in the anterior nares, we developed and  
27 validated a one-step protocol expressing enhanced green fluorescent protein (EGFP) in *S.*  
28 *aureus* clinical strains with the aim to study adhesion to and internalization into mammalian  
29 cells.

30 **Methods:** Twenty *S. aureus* clinical isolates belonging to clonal complexes 5, 8, 30, 45, 398  
31 were selected for one-step transformation protocol with the EGFP-encoding plasmid pBSU101.  
32 EGFP expression was analysed by flow cytometry and confocal microscopy. Wild type and  
33 isogenic EGFP-expressing strains were compared for adhesion and internalization levels by  
34 using the HaCaT cell model.

35 **Results:** Transformation was achieved in all the *S. aureus* strains regardless of their genetic  
36 background. The flow cytometry analysis showed that the mean proportion of EGFP-expressing  
37 bacteria was 97.2% ( $\pm$  2.1) after 4h of incubation. Adhesion and internalization levels were  
38 similar in wild-type and isogenic EGFP-expressing *S. aureus* strains. Confocal laser scanning  
39 microscopy confirmed that EGFP-expressing *S. aureus* bacteria could be easily identified inside  
40 HaCaT keratinocytes.

41 **Conclusion:** This study reports an efficient protocol for expressing EGFP in *S. aureus* clinical  
42 strains and demonstrates that these EGFP-expressing strains are suitable for adhesion and  
43 internalization assays using HaCaT cells, which allows to perform static and dynamic *in vitro*  
44 studies of *S. aureus* colonization.

## 45 INTRODUCTION

46

47 *Staphylococcus aureus* acts as both a leading cause of infections and a commensal bacterium  
48 in humans [1,2]. Approximately one third of the worldwide population is colonized by *S.*  
49 *aureus*; the anterior nares are considered as the main reservoir [1]. For long considered as an  
50 exclusive extracellular bacterium, *S. aureus* has been shown to be able to invade many non-  
51 professional phagocytic cells (NPPCs) *in vitro* but also *in vivo* during colonization or infection  
52 [3–6]. The tripartite interaction between fibronectin, the  $\alpha 5\beta 1$  integrin exposed at the host cell  
53 plasma membrane and fibronectin-binding proteins expressed by *S. aureus* is widely  
54 acknowledged as the main internalization pathway of *S. aureus* in NPPCs [7]. However, several  
55 others *S. aureus* virulence factors such as staphylococcal autolysin (Atl) and extracellular  
56 adherence protein (EAP) have been found to foster *S. aureus* internalization in NPPCs [8,9].

57 By contrast to the important knowledge generated from “laboratory” strains such as Newman  
58 or the 8325-4 derivative strains, little is known about the mechanisms driving the internalization  
59 rate and the intracellular persistence of *S. aureus* clinical isolates. Up to now, genetic  
60 manipulations in the *Staphylococcus* species relied on labour intensive protocols and only a  
61 limited number of *S. aureus* laboratory strains have been genetically modified successfully [10].  
62 In fact, wild type *S. aureus* strains have an impenetrable restriction barrier preventing the uptake  
63 of “foreign” DNA. Monk *et al.* demonstrated that DNA plasmid isolated from *E. coli* DH10B  
64  $\Delta dcm$  (called DC10B) bypasses the conserved type IV restriction system *SauSI*, which  
65 specifically recognizes cytosine methylated DNA, enabling transformation of *S. aureus* clinical  
66 strains [11]. This major finding has extended the possibility of genetic manipulations in *S.*  
67 *aureus* especially regarding clinical strains that are protected from foreign DNA.

68 *In vitro* cell models associated with fluorescent labelling are valuable tools to study the  
69 molecular mechanisms involved in host-pathogen interactions. However, after labelling live

70 bacteria with fluorescent reporter, the fluorescence intensity decreases during time according  
71 to the multiplication of live bacteria (*i.e.* the quantity of fluorescent reporter is divided by two  
72 at each bacterial multiplication). The transformation of bacterial strains bearing a gene coding  
73 for a fluorescent reporter such as enhanced green fluorescent protein (EGFP) helps to overcome  
74 this limitation [12] and such bacteria could be tracked inside the cells for a few hours [13].  
75 The aim of the present work was to develop and validate a one-step transformation protocol for  
76 constructing EGFP-expressing *S. aureus* clinical strains belonging to different genetic  
77 backgrounds without interfering with their adhesion and internalization capacities on a  
78 keratinocyte model.

79

## 80 **MATERIALS AND METHODS**

81

### 82 **Microbiology procedures**

83 The bacterial strains used in this study are listed in **Table 1**. *E. coli* (NM522 and DC10B)  
84 bacteria were grown in Luria-Bertani broth (LB) (ThermoFisher Scientific). *S. aureus* strains  
85 were growth in brain heart infusion (BHI) (Becton Dickinson) or onto tryptic soy agar (TSA)  
86 (Becton Dickinson). Culture media were incubated at 37°C with shaking at 250 rpm in case of  
87 liquid medium. When required, spectinomycin (S4014, Sigma-Aldrich) was added to the  
88 culture medium at the concentration of 120 and 125 mg/l for *S. aureus* and *E. coli*, respectively.  
89 Antimicrobial susceptibility testing of *S. aureus* clinical strains was done with the Vitek2  
90 system (AST-P559, bioMérieux). The minimal inhibitory concentration (MIC) to  
91 spectinomycin was determined by using E-test (529240, bioMérieux). *S. aureus* strains were  
92 genotyped using spa-typing and DNA microarray (*S. aureus* genotyping kit v2.0, Alere) as  
93 previously described [14].

94

## 95 **EGFP-encoding plasmid preparation**

96 The pBSU101 plasmid that was kindly provided by Barbara Spellerberg was used to express  
97 EGFP in *S. aureus*. This shuttle plasmid harbours a copy of the *egfp* gene under the control of  
98 the promoter of the CAMP-factor gene (*cfb*) of *Streptococcus agalactiae*, which enables a high-  
99 level EGFP expression in several Gram-positive bacteria including *S. aureus* [12]. The  
100 pBSU101 was isolated from *E. coli* NM522 (laboratory collection) using mini spin columns  
101 (Nucleospin 740588, Macherey Nagel) according to the manufacturer's instructions and  
102 transformed into *E. coli* DC10B, a gift from Ian Monk, by thermal shock as described [11].

103

## 104 **One-step transformation protocol**

105 *S. aureus* clinical strains were inoculated in tryptic soy broth (TSB) for 24h. Overnight culture  
106 of each strain was diluted to a 0.1 optical density (OD) at 600 nm in pre-warmed TSB and  
107 incubated at 37°C with 250 rpm shaking until OD reached 0.5. Cultures were transferred to  
108 centrifuge tubes and chilled on ice for 10 minutes. The cells were harvested by centrifuging at  
109 4500g at 4°C for 20 minutes, washed twice in ice-cold sterile water (v/v) and pelleted at 4°C.  
110 The cells were then washed in 1/10, 1/25 and 1/200 volume of ice-cold 10% sterile glycerol.  
111 Aliquots of 70 µl were stored at -80°C. For electroporation, the cells were thawed at room  
112 temperature for 10 min, centrifuged at 5000g for 3 min and re-suspended in 50 µl of sterile 10%  
113 glycerol with 500 mM sucrose. Plasmid DNA (1 µg) of pBSU101 isolated from *E. coli* DC10B  
114 was added to the cells in a sterile 0.1 cm electroporation cuvette. The cells were pulsed once at  
115 1.8 kV and 2.5 msec time constant (MicroPulser, Biorad), outgrown in 1 ml of TSB containing  
116 500 mM sucrose for 90 min at 37°C, spread on TSA plates containing 120 mg/l spectinomycin  
117 and incubated overnight at 37°C.

118

## 119 **FACS analysis of EGFP-expressing *S. aureus* clinical strains**

120 Fluorescence stability was checked for all the transformed strains by analyzing the fluorescence  
121 means and the total fluorescent populations during the exponential phase of growth (4 hours)  
122 in BHI (Becton Dickinson) in presence of spectinomycin. A 10 µl-volume of the bacterial  
123 suspension was diluted in 490 µl of sterile distilled water and assayed by flow analysis cell  
124 sorting (FACS) (FACSCantoII, Becton Dickinson). Relative fluorescence values were  
125 determined by analyzing 50000 events for each sample using FACSDiva software (V 6.1.2,  
126 Becton Dickinson).

127

### 128 **Adhesion and internalization assays**

129 Adhesion and internalization of *S. aureus* strains were studied in a model of HaCaT cells (Cell  
130 line service) that mimics nasal colonization as described previously (Rigaill 2018). Briefly  
131 HaCaT cells were seeded into 24-well plates at  $1.5 \times 10^5$  cells per well and maintained with  
132 serum-free medium constituted of 50% RPMI-1640 (R7388, Sigma-Aldrich) and 50% DMEM  
133 (D6429, Sigma-Aldrich) supplemented with 2% Ultrosor G (Pall), 1 mM L-Glutamine (G7513,  
134 Sigma-Aldrich), 1x MEM non-essential amino acids (M7145, Sigma-Aldrich) and 1x  
135 antibiotic/antimycotic solution (A5955, Sigma-Aldrich) for three days at 37°C under 5% CO<sub>2</sub>.  
136 Cells were washed with PBS (806552, Sigma-Aldrich) and the medium was changed with fresh  
137 RPMI-1640 (R8755, Sigma-Aldrich) 24h prior to *S. aureus* inoculation. Spectinomycin (240  
138 mg/l) was added to the wells designed to be infected with EGFP-expressing strains. Confluent  
139 cells ( $10^6$  cells/well) were inoculated with *S. aureus* strains in exponential phase of growth with  
140 a multiplicity of infection (MOI) of 1, and incubated for 2 hours at 37°C under 5% CO<sub>2</sub>. To  
141 quantify both adhered and internalized bacteria, cells were washed 3 times with PBS to remove  
142 free bacteria. To quantify only intracellular bacteria, the remaining extracellular bacteria were  
143 killed by adding 10 mg/l lysostaphin (Ambi Products LLC, NY, USA) for 1h at 37°C under 5%  
144 CO<sub>2</sub>. The efficacy of the lysostaphin treatment was systematically tested by plating the cell

145 supernatant. The infected HaCaT cells were finally lysed by osmotic shock using sterile water,  
146 trypsin-EDTA (Sigma-Aldrich) and 1% Triton X-100 (Sigma-Aldrich) (2:1:1). The count of  
147 viable bacteria was carried out by plating serial dilutions of the lysates on blood agar (43041,  
148 bioMérieux) using an automatic seeder (EasySpiral Dilute, Interscience). The calculation of the  
149 bacterial loads was performed after incubation at 37°C for 24 h, using a plate-reader (Scan1200,  
150 Interscience).

151

### 152 **Confocal laser scanning microscopy (CLSM)**

153 HaCaT cells were grown on glass-bottom 4-chamber culture slides (C354104, Falcon).  
154 Internalization assay was conducted as described above. After treatment with lysostaphin, cells  
155 were washed three times with PBS and fixed with 4% paraformaldehyde (Sigma-Aldrich). Cells  
156 were then permeabilized with 0.1% Triton X-100 and stained with TO-PRO-3 (T3605, Thermo  
157 Fisher Scientific) and rhodamine phalloidin (Molecular Probes). Image stacks were acquired  
158 by FluoView FV1200 CLSM equipped with UPlanSApo 60x/1.35 Oil [infinity]/0.17 FN26.5  
159 objective and FV10-ASW4.1 software (Olympus).

160

### 161 **Statistical analysis**

162 For each strain, adhesion and internalization assays were performed at least three times in two  
163 independent experiences (n = 6). The unpaired t-test was used to compare the levels of adhesion  
164 and internalization of wild-type (WT) and EGFP-expressing strains. *P* values under 0.05 were  
165 considered statistically significant. Statistical tests were performed using GraphPad Prism (v7).

166

## 167 **RESULTS**

168

### 169 **One-step transformation of *S. aureus* clinical isolates**

170 A collection of 20 *S. aureus* clinical strains isolated from bloodstream infection, prosthetic joint  
171 infection and nasal carriage, and belonging to five different clonal complexes (CC5, CC8,  
172 CC30, CC45 and CC398) were randomly selected for evaluating the transformation protocol.  
173 All the strains were susceptible to spectinomycin with MIC ranging from 16 to 48 mg/l (**Table**  
174 **1**). Regardless of the genetic background or the clinical origin, all the *S. aureus* clinical strains  
175 and the reference strain ATCC 29213 were successfully transformed by electroporation with  
176 pBSU101. A single colony of each EGFP-expressing *S. aureus* strain was phenotypically  
177 selected on selective agar under UV light. The expression of EGFP was confirmed on selective  
178 agar plate under UV light and by CLSM (**Figure 1**). The constructs were all resistant to  
179 spectinomycin with a MIC of more than 128 mg/l (data not shown).

180

#### 181 **EGFP expression by laboratory and clinical strains of *S. aureus***

182 EGFP expression in *S. aureus* clinical strains was assessed by FACS using the FITC channel.  
183 Figure 2a depicts the FACS diagrams of *S. aureus* ATCC 29213 transformed with pBSU101.  
184 The mean proportion of EGFP-expressing transformed bacteria was 97.2% ( $\pm 2.1$ ) for the 20  
185 clinical strains (**Figure 2b**). Regarding the clonal complex, the mean proportions of EGFP-  
186 expressing bacteria ( $\pm$  SD) was 97.9% ( $\pm 0.7$ ), 97.9% ( $\pm 0.4$ ), 96.8% ( $\pm 3.0$ ), 98.0% ( $\pm 1.2$ ) and  
187 95.3% ( $\pm 3.0$ ) for CC5, CC8, CC30, CC45 and CC398 strains, respectively. The mean  
188 fluorescence intensity (MFI) varied from one strain to another independently of its clonal  
189 complex or clinical origin (**Figure 2b**).

190

#### 191 **Adhesion and internalization of EGFP-expressing *S. aureus* strains**

192 The adhesion and internalization levels of both EGFP-expressing and WT strains were assessed  
193 using a cell model of HaCaT keratinocytes inoculated at a MOI of 1. The mean  $\pm$  SEM adhesion  
194 level was  $6.50 \pm 0.06$  and  $6.44 \pm 0.05$  log CFU/10<sup>6</sup> cells for EGFP-expressing *S. aureus* and



195 parental WT strains, respectively (**Figure 3a**). The mean  $\pm$  SEM internalization level at 2h post-  
196 inoculation was  $4.04 \pm 0.08$  and  $4.03 \pm 0.07$  log CFU/ $10^6$  cells for EGFP-expressing *S. aureus*  
197 and parental WT strains, respectively (**Figure 3b**). CLSM was used to visualize EGFP-  
198 expressing strains inside HaCaT keratinocytes 2h post-inoculation: similar patterns of  
199 intracellular bacteria were observed with all the tested strains (**Figure 4**).

200

## 201 **DISCUSSION**

202

203 We report herein EGFP-expression of a panel of *S. aureus* clinical strains belonging to five  
204 different genetic backgrounds by using a one-step transformation protocol based on the  
205 pBSU101 plasmid. This one-step protocol, previously described by Monk *et al.* [11] and based  
206 on the use of the *E. coli* DC10B strain, accelerates the transformation process of *S. aureus*,  
207 allowing its application to clinical isolates from different clonal complexes. For the first time,  
208 we demonstrate that the expression of EGFP decreases neither the adhesion of transformed *S.*  
209 *aureus* to keratinocytes nor their internalization into these cells.

210 The pBSU101 plasmid used in this study harbours a copy of the green fluorescent variant gene  
211 *egfp* under the control of the CAMP-factor gene (*cfb*) promoter of *Streptococcus agalactiae*  
212 [12]. By using this plasmid, the fluorescent reporter is not present at the surface of the bacteria,  
213 which avoids masking *S. aureus* surface proteins that could be involved in adhesion or  
214 internalization process. This labelling process is therefore interesting for studying interactions  
215 between *S. aureus* and host cells. By contrast, fluorescent labelling methods using dye (e.g.  
216 Vancomycin Bodipy FL) or antibodies that interact with the bacterial cell wall could modify  
217 interactions with cell host receptors [15]. In this study, we show that EGFP expressed inside  
218 the bacteria does not modify adhesion and internalization capacities of *S. aureus*. Thus we could

219 hypothesize that the expression of the fibronectin binding proteins, the major invasion factor in  
220 *S. aureus*, is not impacted by the labelling process.

221 In addition, the EGFP expression enables live imaging of *S. aureus* clinical isolates because the  
222 EGFP expression driven by pBSU101 does not alter the bacterial viability [12] whereas  
223 vancomycin-based labelling has been found to exhibit a bacteriostatic activity that limits its use  
224 over the time [15]. By contrast to staining methods using peptidoglycan-binding or DNA-  
225 binding dyes, plasmid-encoded fluorescent reporters are highly specific since they are  
226 expressed only in transformed strains. Recently, Kato *et al.* [16] developed fluorescent protein  
227 tracing vectors for multicolour imaging of three clinical isolates of *S. aureus* (N315, MW2 and  
228 TY34). Furthermore, imaging of EGFP-expressing *S. aureus* avoids traditional immunostaining  
229 steps including fixation, permeabilisation and antibody labelling. Our results show that  
230 intracellular EGFP-expressing *S. aureus* clinical isolates can be easily localized by CLSM,  
231 allowing to measure the rate of *S. aureus*-invaded cells. This information is interesting since  
232 invasion rates obtained from culture experiments are calculated as mean of viable bacteria  
233 divided by total number of cells and therefore does not give any information about the  
234 distribution of *S. aureus* in the cells monolayer.

235 However, the use of pBSU101 for transforming clinical isolates of *S. aureus* has some limits.  
236 The EGFP fluorescence emission is known to be optimal at pH 7 but decreases almost to zero  
237 at pH 5 [17]. Since internalized *S. aureus* can be found inside phagolysosomes, the detection of  
238 these cocci can therefore be impaired. Other fluorescent proteins (*e.g.* red fluorescent protein)  
239 have been found to resist to pH reduction and could be useful to overcome this limitation.  
240 Besides, EGFP-encoding pBSU101 requires antibiotic selection to foster the transcription of  
241 both acetyltransferase and EGFP. Although the use of an antimicrobial agent is easy in cell  
242 models, it is not suitable in animal models. This limitation can be overpassed by chromosomic  
243 integration that ensures constitutive expression of the fluorescent reporter without the need for

244 antibiotic pressure [18]. However, the protocol is more labour-intensive and may be difficult to  
245 apply to a great number of clinical isolates. We also observed that fluorescence intensity varied  
246 from one strain to another. Automatic quantification of bacteria based on fluorescence intensity  
247 would require a calibration step for each strain. The ability of some strains to form clump could  
248 also have an impact for automated quantification system. Nevertheless, the use of EGFP-  
249 expressing *S. aureus* strains may be easier, more specific and more accurate than live labelling  
250 of bacteria with fluorescent dyes or cell-permeable nuclear probes [15,19]. Although only  
251 EGFP was tested in this study, the pBSU101 plasmid gives opportunity to replace the *egfp* gene  
252 by another gene coding for other fluorescent proteins such as yellow fluorescent protein or  
253 mCherry that have been found suitable to label different *S. aureus* laboratory strains (RN 4220,  
254 SH1000 and SH1001) [20,21].

255 To the best of our knowledge, this is the first report describing a large collection of EGFP-  
256 expressing clinical strains of *S. aureus* that could represent a useful tool for studying adhesion  
257 and internalization within NPPCs such as keratinocytes. This one-step protocol could be further  
258 used to develop similar valuable tools aimed to study lifestyle of *S. aureus* during intracellular  
259 persistence or biofilm formation.

260 **CONFLICT OF INTEREST**

261

262 The authors declare having no conflict of interest related to this study.

263

264 **ACKNOWLEDGMENTS**

265

266 *Escherichia coli* DC10B was kindly provided by Ian Monk (Moyne Institute of Preventive  
267 Medicine, Department of Microbiology, School of Genetics and Microbiology, Trinity College  
268 Dublin, Dublin, Ireland). The pBSU101 plasmid was a gift from Prof. Barbara Spellerberg  
269 (Institute of Medical Microbiology and Hygiene, University of Ulm, Ulm, Germany).

270

271 **FUNDING**

272

273 This study was funded by the Jean Monnet University through a 12-month post-doctoral  
274 contract (SCB). MFM was funded by a PhD grant from the European Erasmus Mundus Al-  
275 Idrisi II program supported by the University of Granada, Spain (2013-2401/001-001-EMA2).

276

277 **CONTRIBUTIONS**

278

279 POV, PB and BP designed the study. SCB performed experiments for transforming *S. aureus*  
280 strains. MFM and JR performed adhesion and internalization assays. SCB, MFM and JR  
281 performed cytometry assays. HZ, JR and EA performed microscopy imaging. POV, MFM,  
282 SCB, AC and EBN analysed the results. POV, MFM, SCB, EBN, FG and BP wrote the  
283 manuscript.

284 **REFERENCES**

- 285 1. Verhoeven PO, Gagnaire J, Botelho-Nevers E, Grattard F, Carricajo A, Lucht F, et al.  
286 Detection and clinical relevance of *Staphylococcus aureus* nasal carriage: an update.  
287 Expert Rev Anti Infect Ther. 2014;12: 75–89. doi:10.1586/14787210.2014.859985
- 288 2. Gagnaire J, Verhoeven PO, Grattard F, Rigaille J, Lucht F, Pozzetto B, et al. Epidemiology  
289 and clinical relevance of *Staphylococcus aureus* intestinal carriage: a systematic review  
290 and meta-analysis. Expert Rev Anti Infect Ther. 2017;15: 767-785  
291 doi:10.1080/14787210.2017.1358611
- 292 3. Garzoni C, Kelley WL. *Staphylococcus aureus*: new evidence for intracellular persistence.  
293 Trends Microbiol. 2009;17: 59–65. doi:10.1016/j.tim.2008.11.005
- 294 4. Hanssen A-M, Kindlund B, Stenklev NC, Furberg A-S, Fismen S, Olsen RS, et al.  
295 Localization of *Staphylococcus aureus* in tissue from the nasal vestibule in healthy  
296 carriers. BMC Microbiol. 2017;17: 89. doi:10.1186/s12866-017-0997-3
- 297 5. Rigaille J, Morgene MF, Gavid M, Lelonge Y, He Z, Carricajo A, et al. Intracellular activity  
298 of antimicrobial compounds used for *Staphylococcus aureus* nasal decolonization. J  
299 Antimicrob Chemother. 2018;73: 3044–3048. doi:10.1093/jac/dky318
- 300 6. Yang D, Wijenayaka AR, Solomon LB, Pederson SM, Findlay DM, Kidd SP, et al. Novel  
301 insights into *Staphylococcus aureus* deep bone infections: the involvement of osteocytes.  
302 mBio. 2018;9: pii:e00415-18. doi:10.1128/mBio.00415-18
- 303 7. Josse J, Laurent F, Diot A. Staphylococcal adhesion and host cell invasion: fibronectin-  
304 binding and other mechanisms. Front Microbiol. 2017;8: 2433.  
305 doi:10.3389/fmicb.2017.02433
- 306 8. Bur S, Preissner KT, Herrmann M, Bischoff M. The *Staphylococcus aureus* extracellular  
307 adherence protein promotes bacterial internalisation by keratinocytes independent of

- 308 fibronectin-binding proteins. *J Invest Dermatol.* 2013;133;2004-2012.  
309 doi:10.1038/jid.2013.87
- 310 9. Nguyen MT, Peisl L, Solari FB, Luqman A, Barletta F. Toll-like receptor 2 and  
311 lipoprotein-like lipoproteins enhance *Staphylococcus aureus* invasion in epithelial cells.  
312 *Infect Immun.* 2018; 86: pii: e00627-18. doi:10.1128/IAI.00343-18
- 313 10. Chambers HF, Deleo FR. Waves of resistance: *Staphylococcus aureus* in the antibiotic  
314 era. *Nat Rev Microbiol.* 2009;7: 629–641. doi:10.1038/nrmicro2200
- 315 11. Monk IR, Shah IM, Xu M, Tan M-W, Foster TJ. Transforming the untransformable:  
316 application of direct transformation to manipulate genetically *Staphylococcus aureus* and  
317 *Staphylococcus epidermidis*. *mBio.* 2012;3: e00277-11-e00277-11.  
318 doi:10.1128/mBio.00277-11
- 319 12. Aymanns S, Mauerer S, van Zandbergen G, Wolz C, Spellerberg B. High-level  
320 fluorescence labeling of gram-positive pathogens. *PLoS ONE.* 2011;6: e19822.  
321 doi:10.1371/journal.pone.0019822
- 322 13. Neumann Y, Bruns SA, Rohde M, Prajsnar TK, Foster SJ, Schmitz I. Intracellular  
323 *Staphylococcus aureus* eludes selective autophagy by activating a host cell kinase.  
324 *Autophagy.* 2016;12: 2069–2084. doi:10.1080/15548627.2016.1226732
- 325 14. Verhoeven PO, Haddar CH, Grattard F, Carricajo A, Botelho-Nevers E, Pozzetto B, et al.  
326 Does pharyngeal sampling improve the detection of nasopharyngeal persistent carriers of  
327 *Staphylococcus aureus*? *J Infect.* 2015;70: 549–552. doi:10.1016/j.jinf.2015.01.003
- 328 15. Hildebrandt P, Surmann K, Salazar MG, Normann N, Völker U, Schmidt F. Alternative  
329 fluorescent labeling strategies for characterizing gram-positive pathogenic bacteria: flow  
330 cytometry supported counting, sorting, and proteome analysis of *Staphylococcus aureus*  
331 retrieved from infected host cells. *Cytom Part J Int Soc Anal Cytol.* 2016;89: 932–940.  
332 doi:10.1002/cyto.a.22981

- 333 16. Kato F, Nakamura M, Sugai M. The development of fluorescent protein tracing vectors  
334 for multicolor imaging of clinically isolated *Staphylococcus aureus*. *Sci Rep*. 2017;7:  
335 2865. doi:10.1038/s41598-017-02930-7
- 336 17. Haupts U, Maiti S, Schwille P, Webb WW. Dynamics of fluorescence fluctuations in  
337 green fluorescent protein observed by fluorescence correlation spectroscopy. *Proc Natl*  
338 *Acad Sci U S A*. 1998;95: 13573–13578.
- 339 18. Jong NWM de, Horst T van der, Strijp JAG van, Nijland R. Fluorescent reporters for  
340 markerless genomic integration in *Staphylococcus aureus*. *Sci Rep*. 2017;7: 43889.  
341 doi:10.1038/srep43889
- 342 19. Ko Y-P, Kuipers A, Freitag CM, Jongerius I, Medina E, Rooijen WJ van, et al.  
343 Phagocytosis escape by a *Staphylococcus aureus* protein that connects complement and  
344 coagulation proteins at the bacterial surface. *PLOS Pathog*. 2013;9: e1003816.  
345 doi:10.1371/journal.ppat.1003816
- 346 20. Malone CL, Boles BR, Lauderdale KJ, Thoendel M, Kavanaugh JS, Horswill AR.  
347 Fluorescent reporters for *Staphylococcus aureus*. *J Microbiol Methods*. 2009;77: 251–  
348 260. doi:10.1016/j.mimet.2009.02.011
- 349 21. Rodriguez MD, Paul Z, Wood CE, Rice KC, Triplett EW. Construction of stable  
350 fluorescent reporter plasmids for use in *Staphylococcus aureus*. *Front Microbiol*. 2017;8:  
351 2491. doi:10.3389/fmicb.2017.02491
- 352 22. Rudrik JT, Cavalieri SJ, Britt EM. Proposed quality control and interpretive criteria for  
353 disk diffusion susceptibility testing with enoxacin. *J Clin Microbiol*. 1985;21: 332–334.

354 **TABLE**

355

356 **Table 1.** Bacterial strains used in this study.

| Strains                      | Description/genotype                                                                        | MIC <sub>spec</sub><br>(mg/l) | Origin             |
|------------------------------|---------------------------------------------------------------------------------------------|-------------------------------|--------------------|
| <i>Escherichia coli</i>      |                                                                                             |                               |                    |
| NM522                        | F <sup>+</sup> <i>proAB lacI</i> Δ( <i>lacZ</i> )M15/Δ( <i>lac-proAB</i> ) <i>thi hsd-5</i> | -                             | New England Biolab |
| DC10B                        | <i>dam</i> <sup>+</sup> <i>dcm</i> <sup>-</sup> Δ <i>hsdRMS</i> <i>endA1 recA1</i>          | -                             | [11]               |
| <i>Staphylococcus aureus</i> |                                                                                             |                               |                    |
| ATCC 29213                   | Reference strain                                                                            |                               | [22]               |
| CC5-BJI                      | Bone and joint infection, CC5, t002                                                         | 16                            | Clinical strain    |
| CC5-BSI                      | Bacteraemia, CC5, t13478                                                                    | 16                            | Clinical strain    |
| CC5-COL1                     | Nasal colonization, CC5, t002                                                               | 16                            | Clinical strain    |
| CC5-COL2                     | Nasal colonization, CC5, t002                                                               | 16                            | Clinical strain    |
| CC8-BJI                      | Bone and joint infection, CC8, t008                                                         | 16                            | Clinical strain    |
| CC8-BSI                      | Bacteraemia, CC8, t1905                                                                     | 16                            | Clinical strain    |
| CC8-COL1                     | Nasal colonization, CC8, t008                                                               | 16                            | Clinical strain    |
| CC8-COL2                     | Nasal colonization, CC8, t008                                                               | 16                            | Clinical strain    |
| CC30-BJI                     | Bone and joint infection, CC30, t012                                                        | 16                            | Clinical strain    |
| CC30-BSI                     | Bacteraemia, CC30, t019                                                                     | 16                            | Clinical strain    |
| CC30-COL1                    | Nasal colonization, CC30, t012                                                              | 16                            | Clinical strain    |
| CC30-COL2                    | Nasal colonization, CC30, t2082                                                             | 32                            | Clinical strain    |
| CC45-BJI                     | Bone and joint infection, CC45, t015                                                        | 16                            | Clinical strain    |
| CC45-BSI                     | Bacteraemia, CC45, t1575                                                                    | 16                            | Clinical strain    |
| CC45-COL1                    | Nasal colonization, CC45, t230                                                              | 24                            | Clinical strain    |
| CC45-COL2                    | Nasal colonization, CC45, t2301                                                             | 24                            | Clinical strain    |
| CC398-BJI                    | Bone and joint infection, CC398, t571                                                       | 24                            | Clinical strain    |
| CC398-BSI                    | Bacteraemia, CC398, t571                                                                    | 24                            | Clinical strain    |
| CC398-COL1                   | Nasal colonization, CC398, t1149                                                            | 24                            | Clinical strain    |
| CC398-COL2                   | Nasal colonization, CC398, t571                                                             | 24                            | Clinical strain    |

357 CC: clonal complex; t: spa type; MIC<sub>spec</sub>: minimal inhibitory concentration for spectinomycin

358



359 **FIGURES**

360

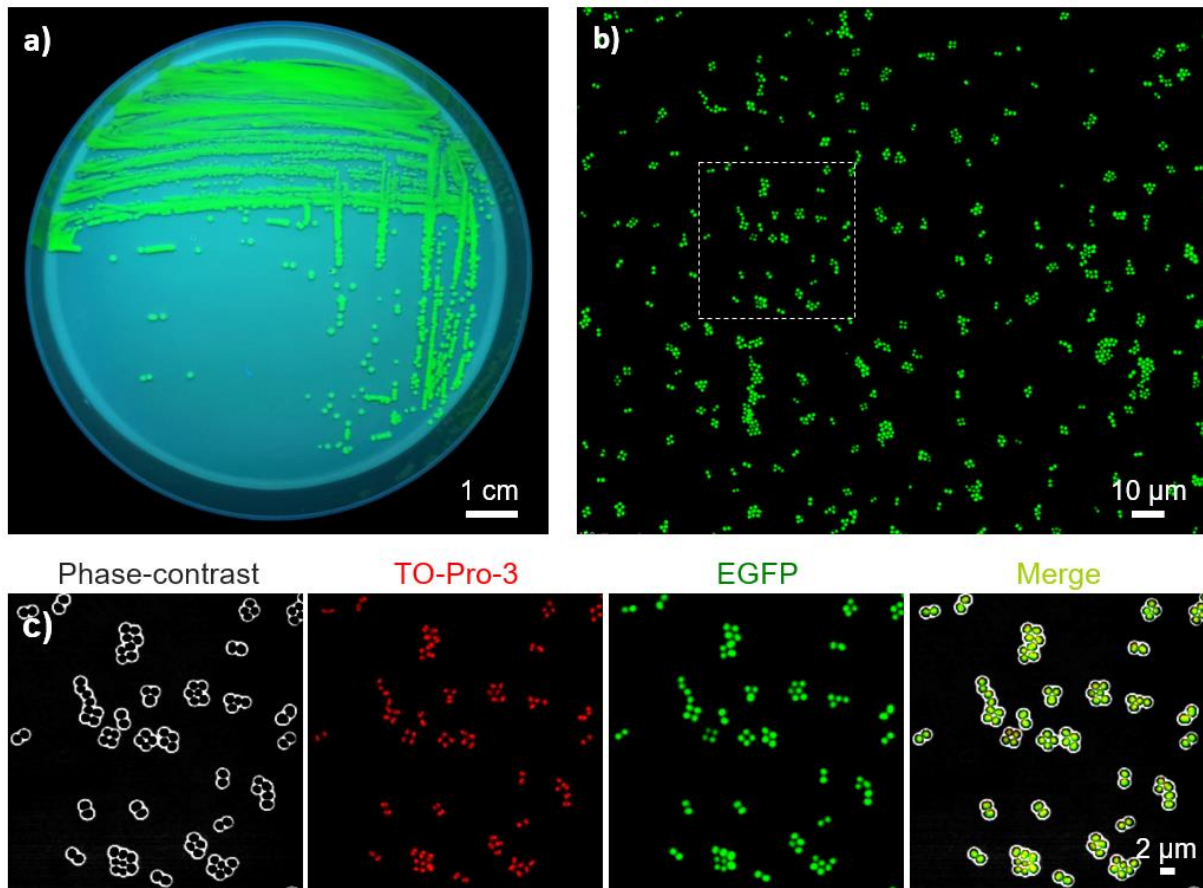

361

362 **Figure 1. Imaging of EGFP-expressing *S. aureus* ATCC 29213 transformed with**  
363 **pBSU101. a) Bacterial colonies observed under UV light after 24 of incubation on TSA**  
364 **supplemented with 120 mg/l spectinomycin. b) Confocal laser scanning microscopy of bacterial**  
365 **smear on glass slide. c) Zoom magnification of bacteria observed in the dotted line box show**  
366 **in 1b; bacteria are depicted in phase-contrast, in the red channel (counter-staining with TO-Pro-**  
367 **3) and in the green channel (EGFP).**

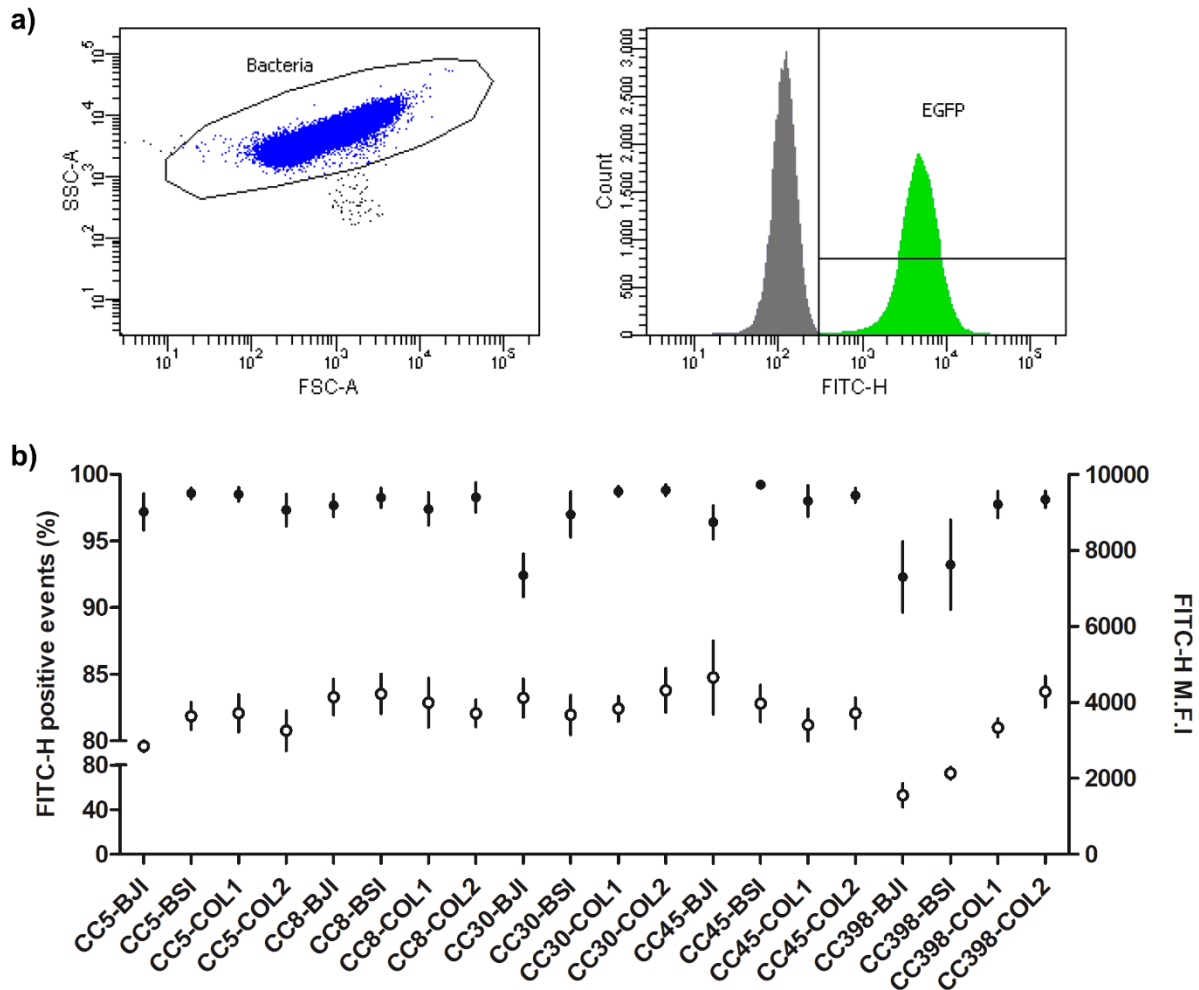

368

369 **Figure 2. FACS analysis of EGFP-expressing *Staphylococcus aureus* strains transformed**

370 **with pBSU101. a) Dot plot and FITC-H histogram of *S. aureus* ATCC 29213 transformed with**

371 **pBSU101. b) FITC-H values of the 20 *S. aureus* clinical strains transformed with pBSU101.**

372 The rate of fluorescent bacteria (closed circles) and the mean fluorescence intensity (open

373 circles) were calculated using EGFP-expressing *S. aureus* strains grown for 4h in brain heart

374 infusion with 120 mg/l spectinomycin. Data represent the mean of 4 independent experiments

375 for which 50000 events were recorded. Vertical bars represent the SEM. CC: clonal complex.

376 BJI: bone and joint infection. BSI: blood stream infection. COL: nasal colonization.

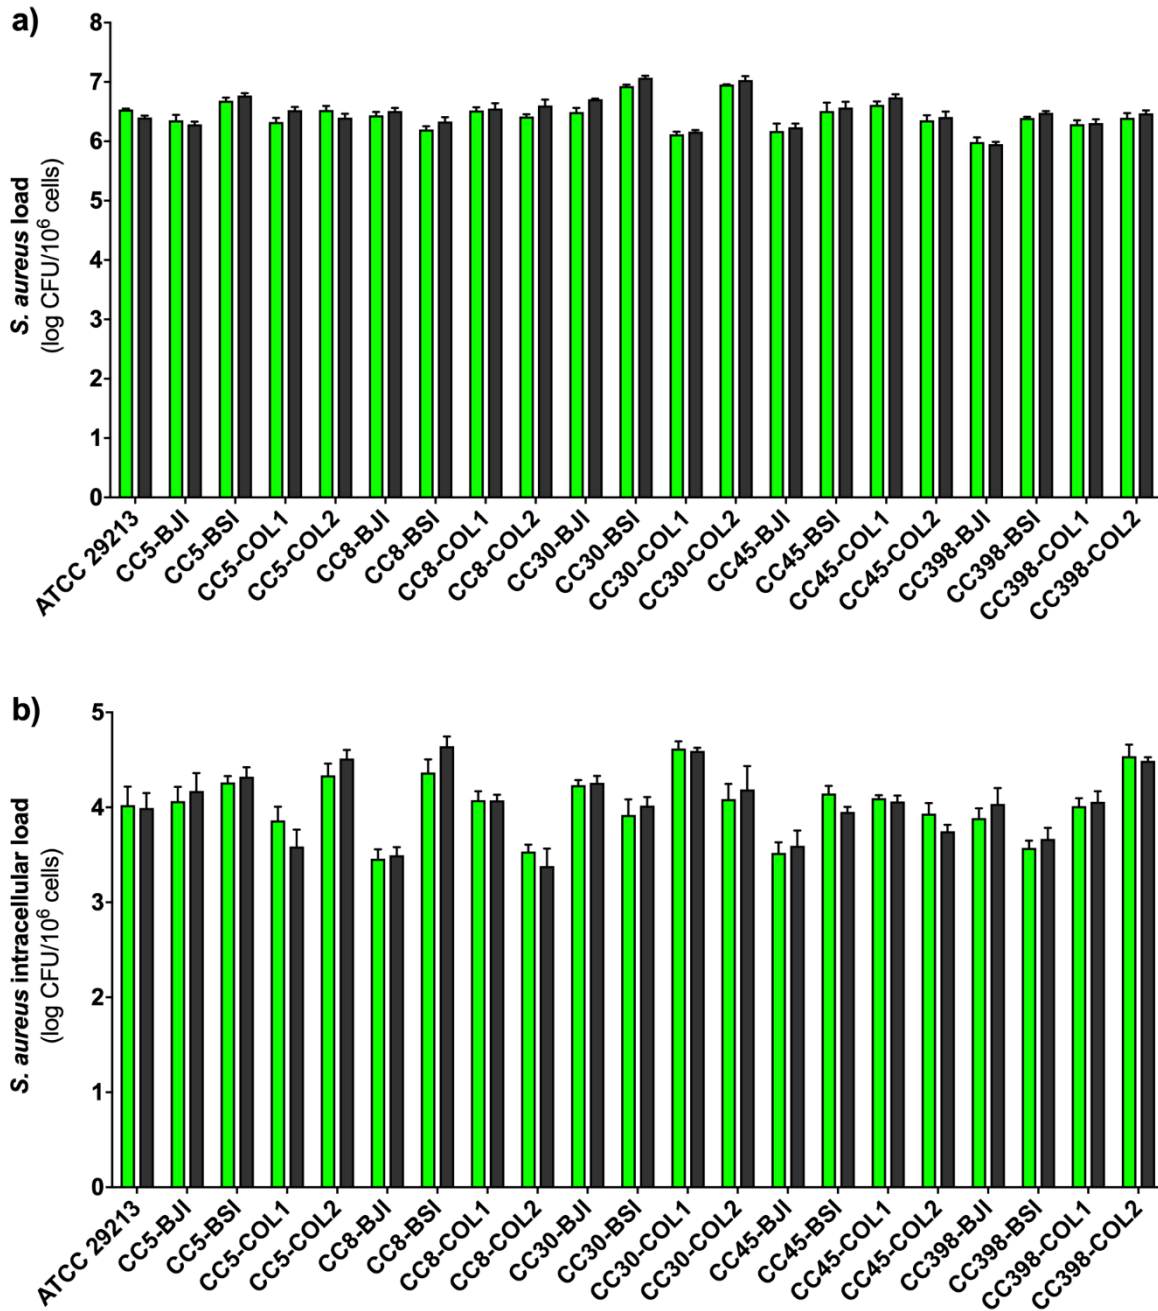

377

378 **Figure 3. Adhesion (a) and internalization (b) levels of EGFP-expressing *S. aureus* clinical**  
379 **strains (green) and their parental wild-type strain (black) by using confluent monolayer**  
380 **of HaCaT cells inoculated with a MOI of 1. Data represent the mean of 2 independent**  
381 **experiments in triplicate (n = 6). Error bars correspond to the SEM. No significant difference**  
382 **was observed between each couple of strains ( $p > 0.05$ ).**

383

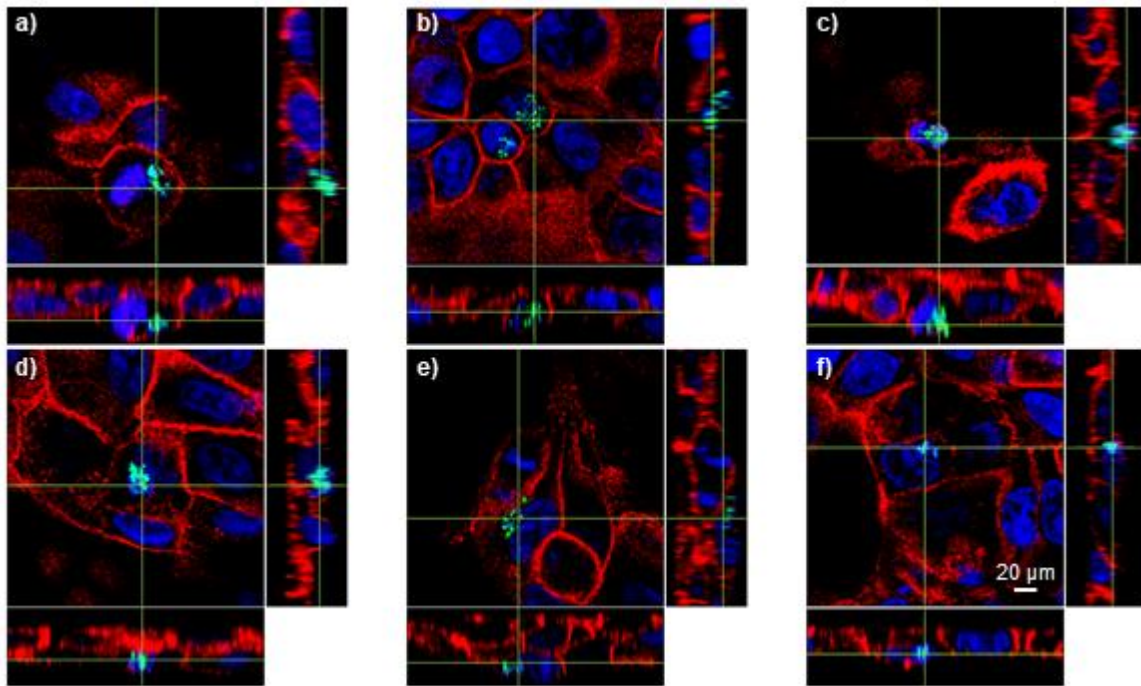

384

385 **Figure 4. Confocal laser scanning microscopy of internalized EGFP-expressing *S. aureus***

386 **clinical strains in HaCaT cells. *S. aureus* strains CC45-COL2 (a), CC8-BJI (b), CC30-BJI (c),**

387 **CC45-COL1 (d), CC398-BSI (e) and ATCC 29213 (f) are depicted in green. F-Actin and nuclei**

388 **of HaCaT cells were stained by rhodamine phalloidin (red) and TO-Pro-3 (blue), respectively.**
